# Supplementary material for: Spinal epidural hematoma and permanent paraplegia following spinal cord stimulator implantation: a case report
Source: PubMed Central journal article supplement — J Spine Surg. 2024 Aug 2;10(3):576–82. doi: 10.21037/jss-23-139 (PMC11467280; doi:10.21037/jss-23-139), 2024-08-02
Supplement: jss-10-03-576-coif.pdf [file jss-10-03-576-coif.pdf]

## ICMJE DISCLOSURE FORM

Date: 1/19/2024

Your Name: Alexander Baur

Manuscript Title: Spinal Epidural Hematoma and Permanent Paraplegia Following Spinal Cord Stimulator Implantation: A Case Report

Manuscript number (if known): JSS-23-139-CL

In the interest of transparency, we ask you to disclose all relationships/activities/interests listed below that are related to the content of your manuscript. "Related" means any relation with for-profit or not-for-profit third parties whose interests may be affected by the content of the manuscript. Disclosure represents a commitment to transparency and does not necessarily indicate a bias. If you are in doubt about whether to list a relationship/activity/interest, it is preferable that you do so.

The following questions apply to the author's relationships/activities/interests as they relate to the current manuscript only.

The author's relationships/activities/interests should be defined broadly. For example, if your manuscript pertains to the epidemiology of hypertension, you should declare all relationships with manufacturers of antihypertensive medication, even if that medication is not mentioned in the manuscript.

In item #1 below, report all support for the work reported in this manuscript without time limit. For all other items, the time frame for disclosure is the past 36 months.

|                                                           |                                                                                                                                                                                | Name all entities with whom you have this relationship or indicate none (add rows as needed) | Specifications/Comments (e.g., if payments were made to you or to your institution) |
|-----------------------------------------------------------|--------------------------------------------------------------------------------------------------------------------------------------------------------------------------------|----------------------------------------------------------------------------------------------|-------------------------------------------------------------------------------------|
| <b>Time frame: Since the initial planning of the work</b> |                                                                                                                                                                                |                                                                                              |                                                                                     |
| 1                                                         | All support for the present manuscript (e.g., funding, provision of study materials, medical writing, article processing charges, etc.)<br><b>No time limit for this item.</b> | ___ None                                                                                     |                                                                                     |
|                                                           |                                                                                                                                                                                |                                                                                              |                                                                                     |
|                                                           |                                                                                                                                                                                |                                                                                              |                                                                                     |
|                                                           |                                                                                                                                                                                |                                                                                              |                                                                                     |
|                                                           |                                                                                                                                                                                |                                                                                              |                                                                                     |
|                                                           |                                                                                                                                                                                |                                                                                              |                                                                                     |
| <b>Time frame: past 36 months</b>                         |                                                                                                                                                                                |                                                                                              |                                                                                     |
| 2                                                         | Grants or contracts from any entity (if not indicated in item #1 above).                                                                                                       | ___ None                                                                                     |                                                                                     |
|                                                           |                                                                                                                                                                                |                                                                                              |                                                                                     |
|                                                           |                                                                                                                                                                                |                                                                                              |                                                                                     |
| 3                                                         | Royalties or licenses                                                                                                                                                          | ___ None                                                                                     |                                                                                     |
|                                                           |                                                                                                                                                                                |                                                                                              |                                                                                     |
|                                                           |                                                                                                                                                                                |                                                                                              |                                                                                     |
| 4                                                         | Consulting fees                                                                                                                                                                | ___ None                                                                                     |                                                                                     |
|                                                           |                                                                                                                                                                                |                                                                                              |                                                                                     |
|                                                           |                                                                                                                                                                                |                                                                                              |                                                                                     |

|    |                                                                                                              |                    |  |
|----|--------------------------------------------------------------------------------------------------------------|--------------------|--|
| 5  | Payment or honoraria for lectures, presentations, speakers bureaus, manuscript writing or educational events | <u>      </u> None |  |
| 6  | Payment for expert testimony                                                                                 | <u>      </u> None |  |
| 7  | Support for attending meetings and/or travel                                                                 | <u>      </u> None |  |
| 8  | Patents planned, issued or pending                                                                           | <u>      </u> None |  |
| 9  | Participation on a Data Safety Monitoring Board or Advisory Board                                            | <u>      </u> None |  |
| 10 | Leadership or fiduciary role in other board, society, committee or advocacy group, paid or unpaid            | <u>      </u> None |  |
| 11 | Stock or stock options                                                                                       | <u>      </u> None |  |
| 12 | Receipt of equipment, materials, drugs, medical writing, gifts or other services                             | <u>      </u> None |  |
| 13 | Other financial or non-financial interests                                                                   | <u>      </u> None |  |

**Please summarize the above conflict of interest in the following box:**

I have no conflicts of interest in relation to the present manuscript or any support provided, including funding, study materials, medical writing, or article processing charges. Over the past 36 months, I have not received any grants or contracts, royalties, consulting fees, payment for lectures or presentations, fees for expert testimony, support for meetings or travel, patents, participation on Data Safety Monitoring or Advisory Boards, leadership roles in boards or societies, stock or stock options, receipt of equipment or materials, or any other financial or non-financial interests.

**Please place an “X” next to the following statement to indicate your agreement:**

  X   I certify that I have answered every question and have not altered the wording of any of the questions on this form.

## ICMJE DISCLOSURE FORM

Date: 1/19/2024  
 Your Name: Keith Lustig  
 Manuscript Title: Spinal Epidural Hematoma and Permanent Paraplegia Following Spinal Cord Stimulator Implantation: A Case Report  
 Manuscript number (if known): JSS-23-139-CL

In the interest of transparency, we ask you to disclose all relationships/activities/interests listed below that are related to the content of your manuscript. "Related" means any relation with for-profit or not-for-profit third parties whose interests may be affected by the content of the manuscript. Disclosure represents a commitment to transparency and does not necessarily indicate a bias. If you are in doubt about whether to list a relationship/activity/interest, it is preferable that you do so.

The following questions apply to the author's relationships/activities/interests as they relate to the current manuscript only.

The author's relationships/activities/interests should be defined broadly. For example, if your manuscript pertains to the epidemiology of hypertension, you should declare all relationships with manufacturers of antihypertensive medication, even if that medication is not mentioned in the manuscript.

In item #1 below, report all support for the work reported in this manuscript without time limit. For all other items, the time frame for disclosure is the past 36 months.

|                                                           |                                                                                                                                                                                | Name all entities with whom you have this relationship or indicate none (add rows as needed) | Specifications/Comments (e.g., if payments were made to you or to your institution) |
|-----------------------------------------------------------|--------------------------------------------------------------------------------------------------------------------------------------------------------------------------------|----------------------------------------------------------------------------------------------|-------------------------------------------------------------------------------------|
| <b>Time frame: Since the initial planning of the work</b> |                                                                                                                                                                                |                                                                                              |                                                                                     |
| 1                                                         | All support for the present manuscript (e.g., funding, provision of study materials, medical writing, article processing charges, etc.)<br><b>No time limit for this item.</b> | ___ None                                                                                     |                                                                                     |
|                                                           |                                                                                                                                                                                |                                                                                              |                                                                                     |
|                                                           |                                                                                                                                                                                |                                                                                              |                                                                                     |
|                                                           |                                                                                                                                                                                |                                                                                              |                                                                                     |
|                                                           |                                                                                                                                                                                |                                                                                              |                                                                                     |
|                                                           |                                                                                                                                                                                |                                                                                              |                                                                                     |
| <b>Time frame: past 36 months</b>                         |                                                                                                                                                                                |                                                                                              |                                                                                     |
| 2                                                         | Grants or contracts from any entity (if not indicated in item #1 above).                                                                                                       | ___ None                                                                                     |                                                                                     |
|                                                           |                                                                                                                                                                                |                                                                                              |                                                                                     |
|                                                           |                                                                                                                                                                                |                                                                                              |                                                                                     |
| 3                                                         | Royalties or licenses                                                                                                                                                          | ___ None                                                                                     |                                                                                     |
|                                                           |                                                                                                                                                                                |                                                                                              |                                                                                     |
|                                                           |                                                                                                                                                                                |                                                                                              |                                                                                     |
| 4                                                         | Consulting fees                                                                                                                                                                | ___ None                                                                                     |                                                                                     |
|                                                           |                                                                                                                                                                                |                                                                                              |                                                                                     |
|                                                           |                                                                                                                                                                                |                                                                                              |                                                                                     |

|    |                                                                                                              |            |  |
|----|--------------------------------------------------------------------------------------------------------------|------------|--|
| 5  | Payment or honoraria for lectures, presentations, speakers bureaus, manuscript writing or educational events | _____ None |  |
| 6  | Payment for expert testimony                                                                                 | _____ None |  |
| 7  | Support for attending meetings and/or travel                                                                 | _____ None |  |
| 8  | Patents planned, issued or pending                                                                           | _____ None |  |
| 9  | Participation on a Data Safety Monitoring Board or Advisory Board                                            | _____ None |  |
| 10 | Leadership or fiduciary role in other board, society, committee or advocacy group, paid or unpaid            | _____ None |  |
| 11 | Stock or stock options                                                                                       | _____ None |  |
| 12 | Receipt of equipment, materials, drugs, medical writing, gifts or other services                             | _____ None |  |
| 13 | Other financial or non-financial interests                                                                   | _____ None |  |

**Please summarize the above conflict of interest in the following box:**

I do not have any conflicts of interest concerning the current manuscript or any associated support, which includes funding, study materials, medical writing, or article processing charges. In the last 36 months, I have not obtained grants or contracts, received royalties, consulting fees, payment for lectures or presentations, fees for expert testimony, support for meetings or travel, patents, participation on Data Safety Monitoring or Advisory Boards, leadership roles in boards or societies, stock or stock options, receipt of equipment or materials, or any other financial or non-financial interests.

**Please place an "X" next to the following statement to indicate your agreement:**

X  I certify that I have answered every question and have not altered the wording of any of the questions on this form.
